# Supplementary material for: Technical note: Measurements of fluorescent dissolved organic matter (FDOM) in seawater (filter blanks, pore sizes, and storage)
Source: Copernicus journal article supplement (doi:10.5194/bg-22-4423-2025), 2025-09-04
Supplement: Supplementary file 1 [file bg-22-4423-2025-supplement.zip]

## Sheet: Filter blank
		pre-combusted GF/F						Membrane filter
	Wash volume (mL)	C peak	error	M peak	error	T peak	error	C peak	error	M peak	error	T peak	error
Distilled water	5	0	0	0.140877	0.109841	0	0	0	0	0	0	0.269489	0.0919304
	10	0	0	0.0265737	0.046027	0	0	0	0	0	0	0.0805455	0.0657769
	15	0	0	0.0118122	0.0204594	0	0	0	0	0	0	0.0285448	0.049441
	20	0	0	0.00506882	0.00877946	0	0	0	0	0.00701411	0.0121488	0	0
	30	0	0	0	0	0	0	0	0	0	0	0	0
	50	0	0	0	0	0	0	0	0	0	0	0	0
	100	0	0	0	0	0	0	0	0	0	0	0	0
0.1 M HCl	5	0	0	0.00281868	0.0048821	0	0	0	0	0	0	0	0
	10	0	0	0	0	0	0	0	0	0	0	0	0
	15	0	0	0	0	0	0	0	0	0	0	0	0
	20	0	0	0	0	0	0	0	0	0	0	0	0
	30	0	0	0	0	0	0	0	0	0	0	0	0
	50	0	0	0	0	0	0	0	0	0	0	0	0
	100	0	0	0	0	0	0	0	0	0	0	0	0
	*Errors are represented by the standrd deviation

## Sheet: Filter poresize, storage
Station	Depth (m)	Filtering	Storage	Measurement (d)	C peak	M peak	T peak
EC1	3	Unfiltered	Room temp. (25℃)	0	0.4379	0.7811	0.3508
				1	0.3958	0.711	0.377
				3	0.4269	0.7151	0.5114
				5	0.4631	0.6906	0.5138
				7	0.4038	0.6717	0.3791
				14	0.4642	0.6549	0.6304
				21	0.419	0.5843	0.4685
EC1	3	Unfiltered	Refrigerator (4℃)	0	0.4379	0.7811	0.3508
				1	0.4052	0.7329	0.3586
				3	0.4412	0.7441	0.2505
				5	0.4594	0.7503	0.3193
				7	0.4501	0.7413	0.2367
				14	0.4867	0.7494	0.3602
				21	0.4344	0.6547	0.3248
EC1	3	Unfiltered	Freezer (-20℃)	0	0.4379	0.7811	0.3508
				1	0.3949	0.7545	0.3351
				3	0.4183	0.7705	0.2282
				5	0.4238	0.7756	0.2432
				7	0.4108	0.7365	0.1655
				14	0.4702	0.772	0.2833
				21	0.3966	0.7047	0.223
EC1	3	GF/F (0.7 μm)	Room temp. (25℃)	0	0.439	0.7903	0.2796
				1	0.4095	0.7269	0.2989
				3	0.4095	0.7318	0.2383
				5	0.4609	0.7143	0.2362
				7	0.4466	0.6483	0.1893
				14	0.4608	0.6934	0.2175
				21	0.4234	0.6258	0.1902
EC1	3	GF/F (0.7 μm)	Refrigerator (4℃)	0	0.439	0.7903	0.2796
				1	0.3981	0.7309	0.2746
				3	0.4263	0.7482	0.19
				5	0.436	0.7427	0.2202
				7	0.4301	0.7247	0.1702
				14	0.4648	0.7338	0.2465
				21	0.4145	0.673	0.247
EC1	3	GF/F (0.7 μm)	Freezer (-20℃)	0	0.439	0.7903	0.2796
				1	0.4042	0.728	0.2842
				3	0.4118	0.7546	0.1776
				5	0.433	0.753	0.2004
				7	0.4399	0.7271	0.1441
				14	0.4509	0.7713	0.2202
				21	0.3982	0.7087	0.2023
EC1	3	Membrane (0.2 μm)	Room temp. (25℃)	0	0.4369	0.7645	0.2789
				1	0.408	0.73	0.2728
				3	0.3908	0.751	0.287
				5	0.4346	0.7659	0.3403
				7	0.4534	0.7042	0.2141
				14	0.5062	0.6985	0.3032
				21	0.4874	0.5961	0.3974
EC1	3	Membrane (0.2 μm)	Refrigerator (4℃)	0	0.4369	0.7645	0.2789
				1	0.3866	0.7314	0.2707
				3	0.442	0.7365	0.1838
				5	0.415	0.7617	0.2385
				7	0.3996	0.7231	0.1452
				14	0.4471	0.7478	0.2267
				21	0.3863	0.704	0.2407
EC1	3	Membrane (0.2 μm)	Freezer (-20℃)	0	0.4369	0.7645	0.2789
				1	0.3682	0.7192	0.2557
				3	0.4006	0.7614	0.185
				5	0.4169	0.7437	0.208
				7	0.3906	0.7167	0.1172
				14	0.4367	0.7581	0.1928
				21	0.3968	0.6999	0.1854
EC1	300	Unfiltered	Room temp. (25℃)	0	0.5285	0.9741	0.2627
				1	0.4843	0.8795	0.2514
				3	0.5163	0.894	0.1709
				5	0.5329	0.9006	0.2608
				7	0.529	0.8726	0.1737
				14	0.5776	0.8837	0.2438
				21	0.492	0.804	0.2326
EC1	300	Unfiltered	Refrigerator (4℃)	0	0.5285	0.9741	0.2627
				1	0.4843	0.8795	0.2514
				3	0.5163	0.894	0.1709
				5	0.5329	0.9006	0.2608
				7	0.529	0.8726	0.1737
				14	0.5776	0.8837	0.2438
				21	0.492	0.804	0.2326
EC1	300	Unfiltered	Freezer (-20℃)	0	0.5285	0.9741	0.2627
				1	0.4896	0.8952	0.2247
				3	0.5253	0.9188	0.1831
				5	0.5144	0.9064	0.1697
				7	0.5004	0.8912	0.0894
				14	0.5421	0.9699	0.1798
				21	0.4793	0.8807	0.1489
EC1	300	GF/F (0.7 μm)	Room temp. (25℃)	0	0.5419	0.9482	0.2627
				1	0.4746	0.8868	0.2247
				3	0.5263	0.925	0.1831
				5	0.568	0.8718	0.1697
				7	0.5906	0.7924	0.0894
				14	0.5637	0.7833	0.1798
				21	0.5333	0.6882	0.1489
EC1	300	GF/F (0.7 μm)	Refrigerator (4℃)	0	0.5419	0.9482	0.2273
				1	0.4851	0.8794	0.2247
				3	0.5036	0.9167	0.1317
				5	0.5185	0.909	0.185
				7	0.5046	0.8891	0.1177
				14	0.5437	0.9156	0.2774
				21	0.4747	0.8191	0.2265
EC1	300	GF/F (0.7 μm)	Freezer (-20℃)	0	0.5419	0.9482	0.2273
				1	0.4675	0.8809	0.2247
				3	0.5044	0.9217	0.1324
				5	0.4675	0.9217	0.1324
				7	0.5044	0.8639	0.0952
				14	0.4675	0.8811	0.1533
				21	0.4867	0.8656	0.1631
EC1	300	Membrane (0.2 μm)	Room temp. (25℃)	0	0.4683	0.8891	0.1804
				1	0.4823	0.8859	0.2247
				3	0.5183	0.9078	0.1882
				5	0.5384	0.8996	0.2534
				7	0.5509	0.8405	0.2329
				14	0.5976	0.8632	0.2542
				21	0.5578	0.7637	0.3218
EC1	300	Membrane (0.2 μm)	Refrigerator (4℃)	0	0.4683	0.8891	0.1804
				1	0.5263	0.925	0.2247
				3	0.568	0.8718	0.2024
				5	0.5906	0.8405	0.1268
				7	0.5384	0.8996	0.2329
				14	0.5509	0.8405	0.2542
				21	0.5976	0.8632	0.3218
EC1	300	Membrane (0.2 μm)	Freezer (-20℃)	0	0.4683	0.8891	0.1804
				1	0.4807	0.8871	0.2247
				3	0.4807	0.8891	0.2024
				5	0.5241	0.9102	0.1268
				7	0.5185	0.909	0.185
				14	0.5046	0.8891	0.1177
				21	0.5384	0.8996	0.2534
EC1	2300	Unfiltered	Room temp. (25℃)	0	0.6292	0.6407	0.2125
				1	0.6178	0.578	0.2458
				3	0.656	0.5842	0.1836
				5	0.6743	0.5862	0.242
				7	0.6411	0.6196	0.1561
				14	0.6609	0.6542	0.1133
				21	0.6987	0.6282	0.1519
EC1	2300	Unfiltered	Refrigerator (4℃)	0	0.6292	0.6407	0.2125
				1	0.6178	0.578	0.2458
				3	0.656	0.5842	0.1836
				5	0.6743	0.5862	0.242
				7	0.6566	0.5803	0.1641
				14	0.7251	0.5772	0.2268
				21	0.6341	0.5385	0.2219
EC1	2300	Unfiltered	Freezer (-20℃)	0	0.6292	0.6407	0.2125
				1	0.6251	0.6065	0.1935
				3	0.6499	0.6326	0.1731
				5	0.6411	0.6196	0.1561
				7	0.6609	0.6542	0.1133
				14	0.6987	0.6282	0.1519
				21	0.6444	0.5943	0.2031
EC1	2300	GF/F (0.7 μm)	Room temp. (25℃)	0	0.6618	0.6324	0.1812
				1	0.6217	0.6088	0.1935
				3	0.6521	0.6002	0.1416
				5	0.6521	0.6002	0.1416
				7	0.7084	0.6282	0.2829
				14	0.7687	0.564	0.3337
				21	0.7084	0.5171	0.2829
EC1	2300	GF/F (0.7 μm)	Refrigerator (4℃)	0	0.6618	0.6324	0.1812
				1	0.6267	0.5842	0.1935
				3	0.6358	0.6128	0.1383
				5	0.6407	0.6163	0.1612
				7	0.6365	0.5929	0.1126
				14	0.6889	0.6117	0.3472
				21	0.6365	0.5525	0.3296
EC1	2300	GF/F (0.7 μm)	Freezer (-20℃)	0	0.6618	0.6324	0.1812
				1	0.6017	0.5873	0.1935
				3	0.6308	0.6243	0.1318
				5	0.6444	0.6082	0.1386
				7	0.6114	0.5889	0.0642
				14	0.6696	0.6184	0.1364
				21	0.5955	0.564	0.134
EC1	2300	Membrane (0.2 μm)	Room temp. (25℃)	0	0.6689	0.6309	0.1937
				1	0.6104	0.5866	0.1935
				3	0.6414	0.6087	0.1342
				5	0.6638	0.6125	0.3412
				7	0.6994	0.5677	0.3503
				14	0.733	0.5889	0.3138
				21	0.6593	0.5436	0.2705
EC1	2300	Membrane (0.2 μm)	Refrigerator (4℃)	0	0.6689	0.6309	0.1937
				1	0.6145	0.5873	0.1935
				3	0.6326	0.6047	0.1163
				5	0.6548	0.6375	0.1492
				7	0.6263	0.5899	0.1018
				14	0.6783	0.6103	0.3088
				21	0.6113	0.5753	0.2668
EC1	2300	Membrane (0.2 μm)	Freezer (-20℃)	0	0.6689	0.6309	0.1937
				1	0.6078	0.599	0.1935
				3	0.6439	0.6186	0.1084
				5	0.6537	0.6062	0.1593
				7	0.6359	0.5851	0.0806
				14	0.712	0.6173	0.1542
				21	0.6009	0.5681	0.1389
JH1	0	Unfiltered	Room temp. (25℃)	0	0.8942	0.239	0.8821
				1	0.8665	0.2286	0.8626
				3	0.936	0.2566	0.8502
				5	0.936	0.2566	0.8502
				7	1.0511	0.2513	0.5543
				14	1.0283	0.2668	0.5825
				21	1.182	0.2891	0.4689
JH1	0	Unfiltered	Refrigerator (4℃)	0	0.8942	0.239	0.8821
				1	0.853	0.2318	0.8082
				3	0.9006	0.2501	0.8272
				5	0.8301	0.2114	0.6696
				7	0.8918	0.2384	0.5182
				14	0.8547	0.2455	0.4766
				21	0.8969	0.2367	0.2114
JH1	0	Unfiltered	Freezer (-20℃)	0	0.8942	0.239	0.8821
				1	0.8558	0.2375	0.7224
				3	0.9025	0.233	0.6974
				5	0.8684	0.2409	0.3124
				7	0.9041	0.2637	0.4731
				14	0.8448	0.2063	0.6211
				21	0.9285	0.1954	0.3499
JH1	0	GF/F (0.7 μm)	Room temp. (25℃)	0	0.8976	0.2102	0.4249
				1	0.8726	0.237	0.4818
				3	0.934	0.2504	0.5555
				5	0.8959	0.2229	0.458
				7	0.9994	0.2591	0.4194
				14	0.9963	0.2486	0.3999
				21	1.0727	0.2431	0.376
JH1	0	GF/F (0.7 μm)	Refrigerator (4℃)	0	0.8976	0.2102	0.4249
				1	0.8667	0.2318	0.4703
				3	0.9063	0.2426	0.502
				5	0.8381	0.217	0.3986
				7	0.9208	0.2446	0.4741
				14	0.846	0.2286	0.4619
				21	0.8987	0.2148	0.4207
JH1	0	GF/F (0.7 μm)	Freezer (-20℃)	0	0.8976	0.2102	0.4249
				1	0.8598	0.2365	0.4457
				3	0.8955	0.2493	0.4759
				5	0.9578	0.2605	0.4624
				7	0.9578	0.2605	0.4624
				14	0.8424	0.2288	0.3873
				21	0.8682	0.2059	0.1225
JH1	0	Membrane (0.2 μm)	Room temp. (25℃)	0	0.8196	0.2111	0.3864
				1	0.8694	0.2211	0.436
				3	0.94	0.2369	0.4875
				5	0.9019	0.2079	0.4655
				7	0.983	0.2512	0.482
				14	0.9556	0.2525	0.4536
				21	1.0043	0.265	0.1213
JH1	0	Membrane (0.2 μm)	Refrigerator (4℃)	0	0.8196	0.2111	0.3864
				1	0.8611	0.2314	0.4292
				3	0.9181	0.2394	0.4526
				5	0.8517	0.2256	0.2799
				7	0.9002	0.231	0.3686
				14	0.8604	0.2216	0.4139
				21	0.8701	0.2104	0.1342
JH1	0	Membrane (0.2 μm)	Freezer (-20℃)	0	0.8196	0.2111	0.3864
				1	0.8601	0.227	0.4317
				3	0.9039	0.2349	0.4724
				5	0.9378	0.2308	0.4189
				7	0.9378	0.2308	0.4189
				14	0.8375	0.2111	0.3506
				21	1.0135	0.2718	0.1814
JH2	0	Unfiltered	Room temp. (25℃)	0	0.9793	0.2478	1.0768
				1	0.8613	0.2433	1.088
				3	1.0383	0.2498	1.0024
				5	1.0433	0.2395	1.058
				7	1.148	0.2732	0.8107
				14	0.9456	0.2419	0.5315
				21	1.1561	0.2395	0.3716
JH2	0	Unfiltered	Refrigerator (4℃)	0	0.9793	0.2478	1.0768
				1	0.941	0.2229	0.9844
				3	0.9741	0.2412	1.0057
				5	0.9151	0.2229	0.9736
				7	0.9826	0.253	0.7133
				14	1.0886	0.2931	0.6479
				21	1.0694	0.2508	0.5133
JH2	0	Unfiltered	Freezer (-20℃)	0	0.9793	0.2478	1.0768
				1	0.9829	0.2395	0.9766
				3	1.0186	0.2437	0.9765
				5	0.9218	0.2461	0.3783
				7	0.9218	0.2461	0.3783
				14	0.9519	0.2313	0.7374
				21	1.0791	0.1733	0.6274
JH2	0	GF/F (0.7 μm)	Room temp. (25℃)	0	0.9359	0.2153	0.4322
				1	0.9304	0.2329	0.4234
				3	0.9867	0.2559	0.5935
				5	0.9611	0.2394	0.4516
				7	1.0595	0.2691	0.4881
				14	1.0438	0.2594	0.5101
				21	1.113	0.2648	0.4949
JH2	0	GF/F (0.7 μm)	Refrigerator (4℃)	0	0.9359	0.2153	0.4322
				1	0.9267	0.2241	0.4188
				3	0.9595	0.233	0.5083
				5	0.9267	0.2295	0.3945
				7	0.9471	0.245	0.5112
				14	0.9049	0.2207	0.4976
				21	0.9275	0.2311	0.4835
JH2	0	GF/F (0.7 μm)	Freezer (-20℃)	0	0.9359	0.2153	0.4322
				1	0.9381	0.2406	0.4962
				3	0.9493	0.238	0.5016
				5	0.9493	0.238	0.5016
				7	0.9807	0.2534	0.4889
				14	0.8879	0.2137	0.4235
				21	0.9189	0.2155	0.2076
JH2	0	Membrane (0.2 μm)	Room temp. (25℃)	0	0.9374	0.2109	0.3735
				1	0.9133	0.2354	0.542
				3	0.9847	0.2408	0.5169
				5	0.9847	0.2408	0.5169
				7	1.0829	0.2409	0.4979
				14	1.0161	0.2402	0.4571
				21	1.094	0.2514	0.1626
JH2	0	Membrane (0.2 μm)	Refrigerator (4℃)	0	0.9374	0.2109	0.3735
				1	0.915	0.2385	0.5168
				3	0.9503	0.2395	0.4406
				5	0.9503	0.2395	0.4406
				7	0.9414	0.2274	0.4341
				14	0.889	0.2138	0.418
				21	0.9166	0.2224	0.1109
JH2	0	Membrane (0.2 μm)	Freezer (-20℃)	0	0.9374	0.2109	0.3735
				1	0.8979	0.2202	0.4273
				3	0.9391	0.2352	0.4293
				5	0.9391	0.2352	0.4293
				7	1.0218	0.2569	0.4293
				14	0.8782	0.2132	0.3754
				21	0.8799	0.2161	0.042
JH3	0	Unfiltered	Room temp. (25℃)	0	1.0086	0.2698	1.5883
				1	0.9774	0.255	1.4318
				3	1.0999	0.2883	1.2855
				5	1.1163	0.2999	1.005
				7	1.3165	0.3766	0.9197
				14	1.2797	0.3945	0.8157
				21	1.3773	0.3323	0.6372
JH3	0	Unfiltered	Refrigerator (4℃)	0	1.0086	0.2698	1.5883
				1	0.9674	0.2779	1.4755
				3	1.0375	0.2799	1.6373
				5	0.9477	0.2608	1.196
				7	1.064	0.2852	0.8953
				14	1.0125	0.2642	0.8582
				21	1.1629	0.2501	0.7946
JH3	0	Unfiltered	Freezer (-20℃)	0	1.0086	0.2698	1.5883
				1	0.9822	0.2592	1.3479
				3	1.0013	0.2543	1.1652
				5	0.8705	0.2699	0.4188
				7	1.0136	0.2471	0.8507
				14	0.9447	0.2351	0.8645
				21	1.0655	0.2069	0.6288
JH3	0	GF/F (0.7 μm)	Room temp. (25℃)	0	0.9661	0.2345	0.5259
				1	0.9504	0.257	0.5972
				3	1.0176	0.2876	0.6466
				5	0.9688	0.2545	0.4909
				7	1.0817	0.27	0.5171
				14	1.0359	0.276	0.502
				21	1.0673	0.3126	0.5404
JH3	0	GF/F (0.7 μm)	Refrigerator (4℃)	0	0.9661	0.2345	0.5259
				1	0.9461	0.2563	0.586
				3	0.9788	0.2659	0.5923
				5	0.9067	0.2232	0.5632
				7	0.9809	0.2616	0.5779
				14	0.9119	0.2461	0.5608
				21	0.9627	0.2708	0.5936
JH3	0	GF/F (0.7 μm)	Freezer (-20℃)	0	0.9661	0.2345	0.5259
				1	0.935	0.2581	0.5364
				3	0.9832	0.2795	0.5604
				5	0.9023	0.2411	0.3393
				7	0.9001	0.2485	0.3669
				14	0.9147	0.2536	0.4626
				21	0.9427	0.2342	0.1605
JH3	0	Membrane (0.2 μm)	Room temp. (25℃)	0	0.997	0.2522	0.4988
				1	0.9509	0.2588	0.5302
				3	1.032	0.2761	0.7472
				5	0.9925	0.2442	0.7207
				7	1.1097	0.2864	0.766
				14	1.0971	0.2666	0.7588
				21	1.1882	0.2699	0.3353
JH3	0	Membrane (0.2 μm)	Refrigerator (4℃)	0	0.997	0.2522	0.4988
				1	0.9519	0.2641	0.5765
				3	0.9974	0.2797	0.5401
				5	0.9381	0.2504	0.4455
				7	0.9987	0.2686	0.6388
				14	0.9379	0.2646	0.6456
				21	1.011	0.2552	0.2876
JH3	0	Membrane (0.2 μm)	Freezer (-20℃)	0	0.997	0.2522	0.4988
				1	0.9384	0.2547	0.5225
				3	0.9812	0.29	0.5899
				5	0.8746	0.2131	0.5472
				7	0.9026	0.2269	0.633
				14	0.9082	0.2358	0.4584
				21	0.9166	0.2172	0.1109
