# Supplementary material for: Technical note: Measurements of fluorescent dissolved organic matter (FDOM) in seawater (filter blanks, pore sizes, and storage)
Source: Copernicus journal article supplement (doi:10.5194/bg-22-4423-2025), 2025-09-04
Supplement: Supplementary file 1 [file bg-22-4423-2025-supplement.zip]

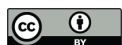

*Supplement of*

**Technical note: Measurements of fluorescent dissolved organic matter (FDOM) in seawater (filter blanks, pore sizes, and storage)**

**Junhyeong Seo et al.**

*Correspondence to:* Junhyeong Seo ([junhyeong@kiost.ac.kr](mailto:junhyeong@kiost.ac.kr))

- [bg-22-4423-2025-supplement-title-page.pdf](#)
- [total data.xlsx](#)

The copyright of individual parts of the supplement might differ from the article licence.
